# Supplementary material for: Lovastatin Decreases the Expression of CD133 and Influences the Differentiation Potential of Human Embryonic Stem Cells
Source: Hindawi journal article supplement (doi:10.1155/2016/1580701), 2016-01-01
Supplement: f1 [file 1580701.f1.pdf]

Suppl.Fig.1

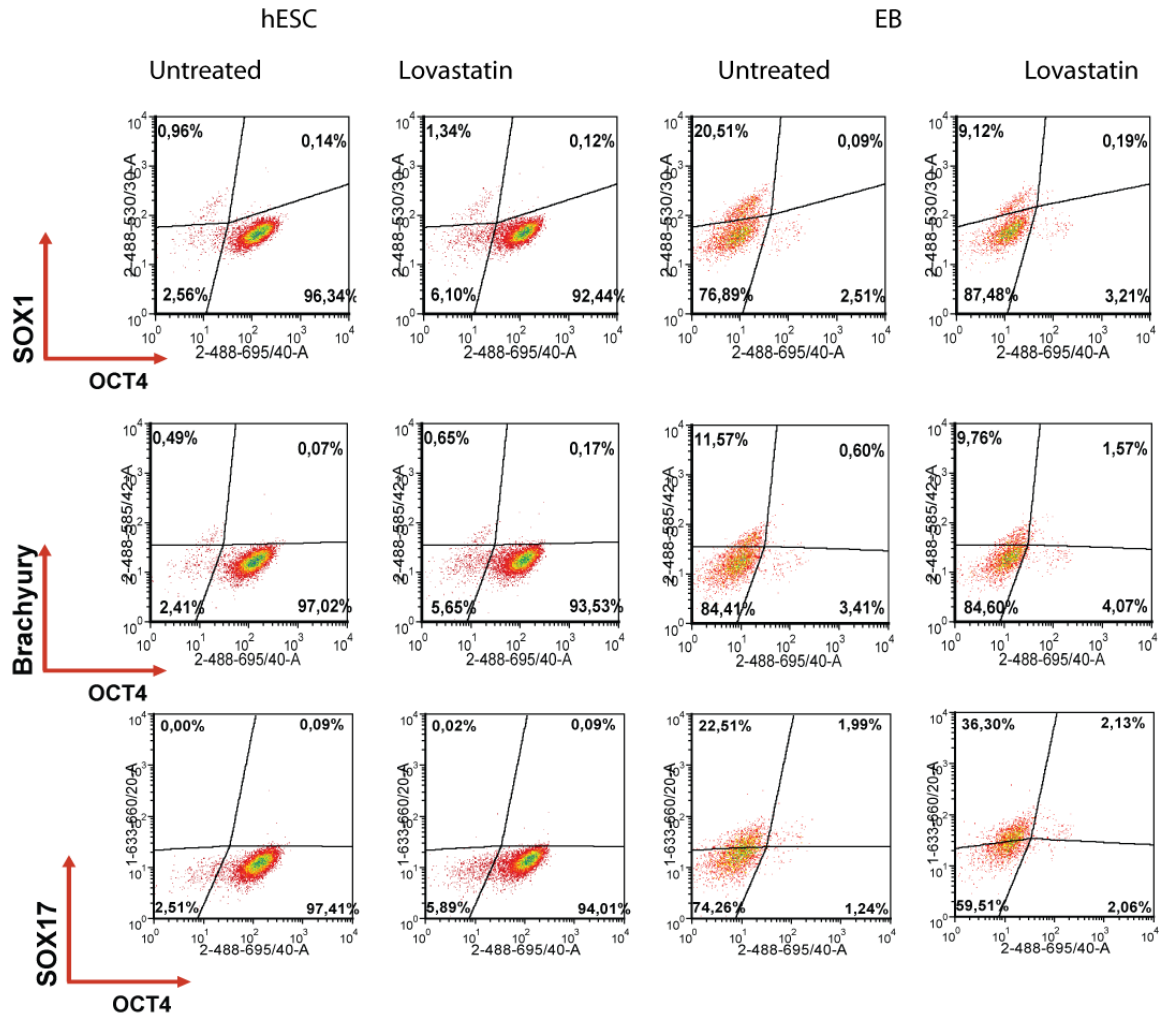

Suppl.Fig.2

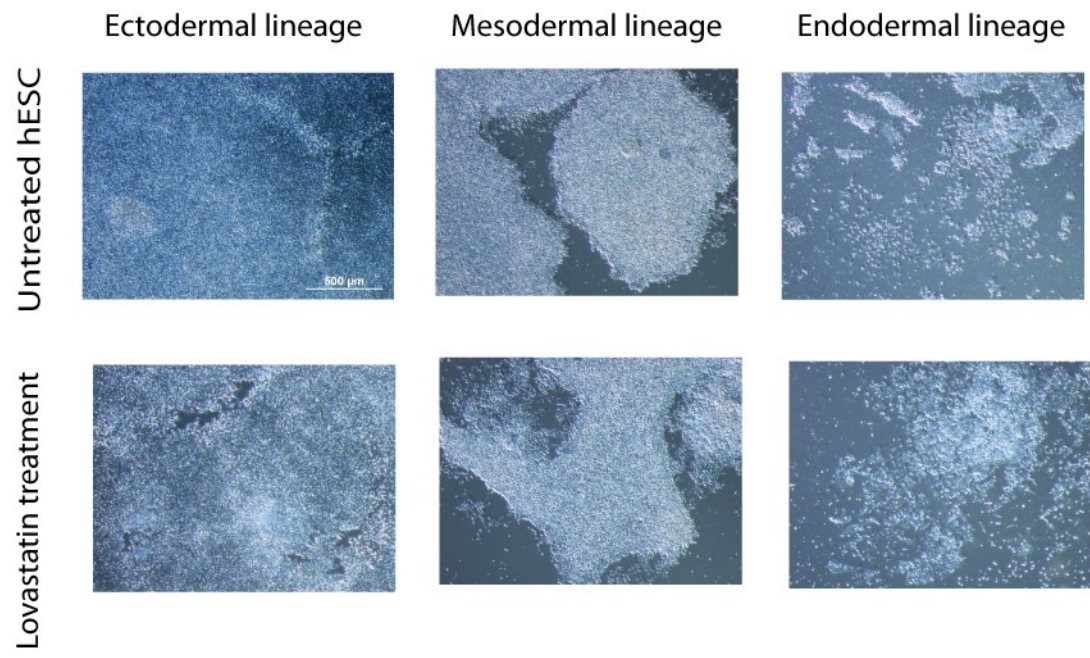

Suppl.Fig. 3

A

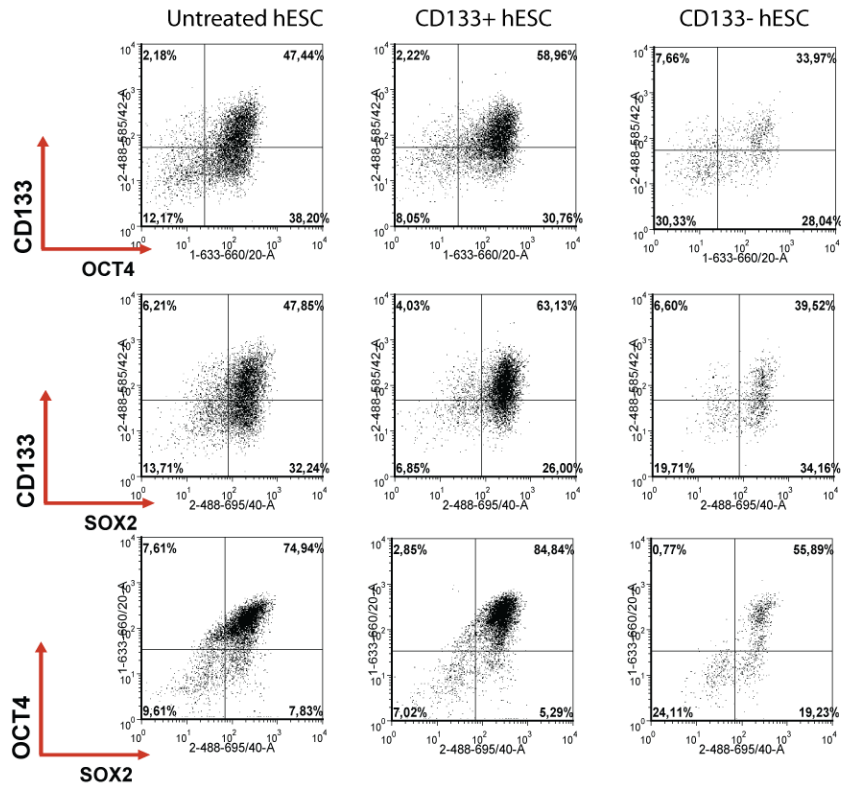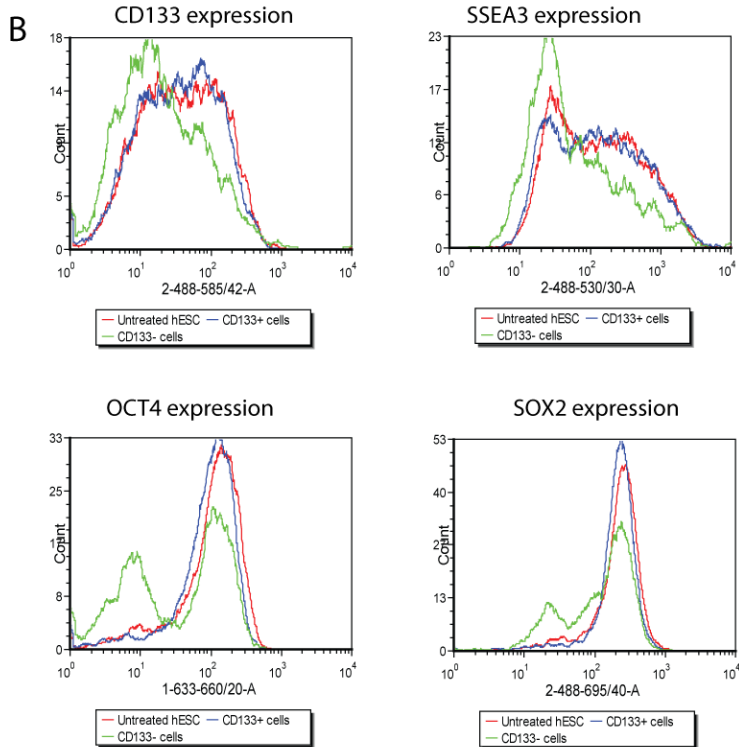

## Supplementary Materials

Figure 1. Expression of differentiation markers and the pluripotency marker OCT4 in hES cells and formed embryoid bodies. hES cells were treated with 20 $\mu$ M lovastatin for 48h, then a sample of the hES cells were analysed for the expression of differentiation markers and OCT4, and EB were formed from another cell sample.

S Figure 2. Morphological changes in the colony structures of untreated and lovastatin treated hES cells during differentiation into ectodermal, mesodermal or endodermal lineages.

S Figure 3. Characterisation of CD133<sup>+</sup> and CD133<sup>-</sup> hES cell subpopulations obtained using the magnetic beads separation (MACS) method. (A) Expression of CD133, OCT4, SSEA3 and SOX2 in these cell populations are displayed as dot plots (A) or histograms that show the distribution of cells in terms of the various expression levels of specific markers (B).
